# Supplementary material
Source: publisher figshare collection journal article supplement (https://acs.figshare.com/ndownloader/files/3713044)
Supplement: Supplementary file 1 [file 3713044]

**Supporting Information for:**

**Order-Order Morphological Transitions for Dual**

**Stimulus-Responsive Diblock Copolymer Vesicles**

Joseph R. Lovett, Nicholas J. Warren, Steven P. Ames\*

*Dainton Building, Department of Chemistry, The University of Sheffield,*

*Brook Hill, Sheffield, Yorkshire, S3 7HF, UK.*

Mark J. Smallridge and Robert B. Cracknell,

*GEO Specialty Chemicals, Hythe, Southampton, Hampshire, SO45 3ZG, UK*

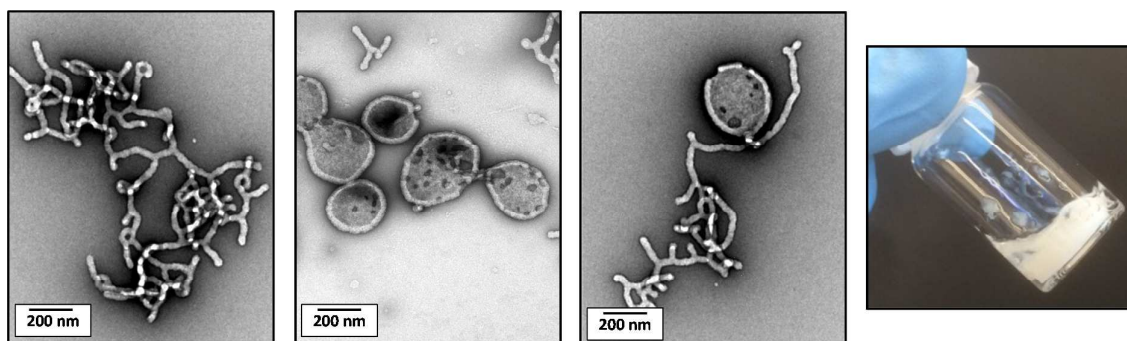

**Figure S1.** Representative TEM images obtained for a 0.1 % w/w aqueous dispersion of HOOC-PGMA<sub>43</sub>-PHPMA<sub>250</sub> diblock copolymer vesicles after cycling from pH 3.5 at 25 °C to pH 6.0 at 5 °C to pH 3.5 at 25 °C. The final dispersion contains a mixture of worms and vesicles and is no longer colloidally stable, indicating irreversible changes in the copolymer morphology.
